# Supplementary material
Source: PubMed Central journal article supplement (PMC3431647)
Supplement: supp_M112.350736_jbc.M112.350736-1.pdf [file supp_M112.350736_jbc.M112.350736-1.pdf]

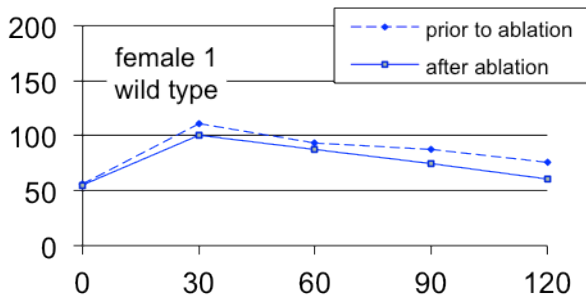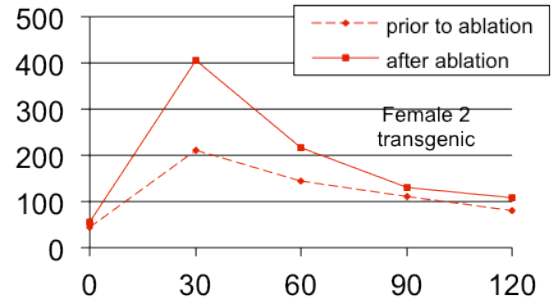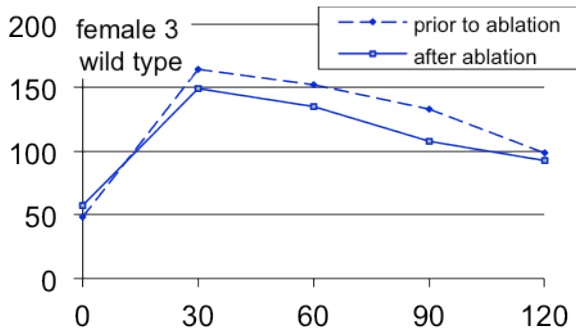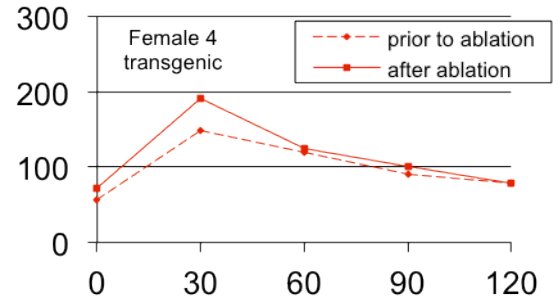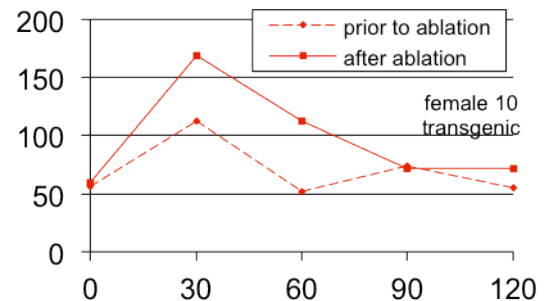

**Supplemental Figure 1: Glucose tolerance tests of some of the individual mice shown in figure 1, prior to and after administration of doxycycline to ablate beta cells. Even transgenic mice which retained relatively normal glucose tolerance, show a deterioration compared with the situation prior to beta cell ablation.**
