# Supplementary material
Source: PubMed Central journal article supplement (PMC3431647)
Supplement: supp_M112.350736_jbc.M112.350736-2.pdf [file supp_M112.350736_jbc.M112.350736-2.pdf]

| genotype                                           | blood glucose | Ins+Ki67+ | Ins+  | % Ki67+ Ins+ cells | slides counted |
|----------------------------------------------------|---------------|-----------|-------|--------------------|----------------|
| after ablation, sacrificed at 15 months            |               |           |       |                    |                |
| wild type                                          | 118           | 53        | 7908  | 0.67               | 2              |
| wild type                                          | 104           | 33        | 15904 | 0.21               | 2              |
| wild type                                          | 123           | 42        | 6391  | 0.66               | 2              |
| βDTA                                               | 148           | 106       | 2396  | 4.42               | 2              |
| βDTA                                               | 116           | 45        | 2234  | 2.01               | 2              |
| βDTA                                               | 141           | 138       | 6542  | 2.11               | 2              |
| βDTA                                               | 133           | 88        | 5354  | 1.64               | 2              |
| βDTA                                               | 147           | 55        | 5523  | 1.00               | 2              |
| after ablation, sacrificed at 17 months            |               |           |       |                    |                |
| wild type                                          | 131           | 23        | 5174  | 0.44               | 2              |
| wild type                                          | 105           | 49        | 10633 | 0.46               | 1              |
| wild type                                          | 120           | 8         | 2580  | 0.31               | 2              |
| βDTA                                               | 148           | 59        | 932   | 6.33               | 2              |
| βDTA                                               | 146           | 40        | 1621  | 2.47               | 2              |
| βDTA                                               | 162           | 119       | 3419  | 3.48               | 2              |
| βDTA                                               | 199           | 251       | 4974  | 5.05               | 2              |
| after ablation, sacrificed at 21.5 months, males   |               |           |       |                    |                |
| wild type                                          | 134           | 6         | 5021  | 0.12               | 3              |
| wild type                                          | 127           | 7         | 7894  | 0.09               | 3              |
| wild type                                          | 113           | 9         | 8219  | 0.11               | 3              |
| wild type                                          | 119           | 5         | 6825  | 0.07               | 3              |
| wild type                                          | 128           | 10        | 5812  | 0.17               | 3              |
| wild type                                          | 105           | 26        | 10830 | 0.24               | 1              |
| wild type                                          | 117           | 15        | 8184  | 0.18               | 2              |
| wild type                                          | 135           | 21        | 14337 | 0.15               | 2              |
| wild type                                          | 136           | 16        | 9640  | 0.17               | 2              |
| βDTA                                               | 160           | 27        | 7117  | 0.38               | 3              |
| βDTA                                               | 142           | 8         | 1781  | 0.45               | 3              |
| βDTA                                               | 124           | 40        | 8345  | 0.48               | 3              |
| after ablation, sacrificed at 25.5 months, females |               |           |       |                    |                |
| wild type                                          | 75            | 13        | 4796  | 0.27               | 3              |
| wild type                                          | 115           | 23        | 9806  | 0.23               | 3              |
| wild type                                          | 73            | 56        | 16826 | 0.33               | 2              |
| βDTA                                               | 143           | 66        | 4051  | 1.63               | 3              |
| βDTA                                               | 158           | 32        | 3284  | 0.97               | 3              |
| βDTA                                               | 125           | 37        | 2385  | 1.55               | 3              |
| βDTA                                               | 99            | 30        | 2512  | 1.19               | 3              |
| βDTA                                               | 148           | 43        | 3216  | 1.34               | 2              |

**Supplemental Table 1: information on the individual mice scored for beta cell replication rate in Figure 2. Glucose was measured at sacrifice (no fasting).**
